# Supplementary material for: A 30-meter terrace mapping in China using Landsat 8 imagery anddigital elevation model based on the Google Earth Engine
Source: Copernicus journal article supplement (doi:10.5194/essd-2020-157), 2020-10-20
Supplement: Supplementary file 1 [file essd-2020-157-supplement.pdf]

## **A 30-meter terrace mapping in China using Landsat 8 imagery and digital elevation model based on the Google Earth Engine**

5 Bowen Cao<sup>1</sup>, Le Yu<sup>1,2,\*</sup>, Victoria Naipal<sup>3</sup>, Philippe Ciais<sup>4</sup>, Wei Li<sup>1,2</sup>, Yuanyuan Zhao<sup>5,6</sup>, Wei Wei<sup>7</sup>, Die Chen<sup>7</sup>, Zhuang Liu<sup>1</sup>, Peng Gong<sup>1,2</sup>

<sup>1</sup>Ministry of Education Key Laboratory for Earth System Modeling, Department of Earth System Science, Tsinghua University, Beijing 100084, China;

<sup>2</sup>Ministry of Education Ecological Field Station for East Asian Migratory Birds, Beijing 100084, China;

<sup>3</sup>Department of Geography, Ludwig-Maximilian University, Munich, Germany;

10 <sup>4</sup>Laboratoire des Sciences du Climat et de l'Environnement, CEA-CNRS-UVSQ, UMR8212, Gif-sur-Yvette, France;

<sup>5</sup>College of Land Science and Technology, China Agricultural University, Beijing 100083, China;

<sup>6</sup>Key Laboratory of Remote Sensing for Agri-Hazards, Ministry of Agriculture and Rural Affairs, Beijing 100083, China;

<sup>7</sup>State Key Laboratory of Urban and Regional Ecology, Research Center for Eco-environmental Sciences, Chinese Academy of Sciences, Beijing 100085, China

15 *Correspondence to:* Le Yu (leyu@tsinghua.edu.cn)

**Table S1: Explanation of variables in Fig. 10 of Section 3.5.**

| Variable   | Explanation                                                        |
|------------|--------------------------------------------------------------------|
| Blue_25th  | The 25th percentile of surface reflectance of Blue band.           |
| Blue_50th  | The 50th percentile of surface reflectance of Blue band.           |
| Blue_75th  | The 75th percentile of surface reflectance of Blue band.           |
| Green_25th | The 25th percentile of surface reflectance of Green band.          |
| Green_50th | The 50th percentile of surface reflectance of Green band.          |
| Green_75th | The 75th percentile of surface reflectance of Green band.          |
| Red_25th   | The 25th percentile of surface reflectance of Red band.            |
| Red_50th   | The 50th percentile of surface reflectance of Red band.            |
| Red_75th   | The 75th percentile of surface reflectance of Red band.            |
| NIR_25th   | The 25th percentile of surface reflectance of NIR band.            |
| NIR_50th   | The 50th percentile of surface reflectance of NIR band.            |
| NIR_75th   | The 75th percentile of surface reflectance of NIR band.            |
| SWIR1_25th | The 25th percentile of surface reflectance of SWIR1 band.          |
| SWIR1_50th | The 50th percentile of surface reflectance of SWIR1 band.          |
| SWIR1_75th | The 75th percentile of surface reflectance of SWIR1 band.          |
| SWIR2_25th | The 25th percentile of surface reflectance of SWIR2 band.          |
| SWIR2_50th | The 50th percentile of surface reflectance of SWIR2 band.          |
| SWIR2_75th | The 75th percentile of surface reflectance of SWIR2 band.          |
| TIRS2_25th | The 25th percentile of surface reflectance of TIRS2 band.          |
| TIRS2_50th | The 50th percentile of surface reflectance of TIRS2 band.          |
| TIRS2_75th | The 75th percentile of surface reflectance of TIRS2 band.          |
| NDVI_p25   | The 25th percentile of Normalized Difference Vegetation Index.     |
| NDVI_p50   | The 50th percentile of Normalized Difference Vegetation Index.     |
| NDVI_p75   | The 75th percentile of Normalized Difference Vegetation Index.     |
| MNDWI_p25  | The 25th percentile of Modified Normalized Difference Water Index. |
| MNDWI_p50  | The 50th percentile of Modified Normalized Difference Water Index. |
| MNDWI_p75  | The 75th percentile of Modified Normalized Difference Water Index. |
| NDBI_p25   | The 25th percentile of Normalized Difference Building Index.       |
| NDBI_p50   | The 50th percentile of Normalized Difference Building Index.       |
| NDBI_p75   | The 75th percentile of Normalized Difference Building Index.       |
| BSI_p25    | The 25th percentile of Bold Soil Index.                            |
| BSI_p50    | The 50th percentile of Bold Soil Index.                            |
| BSI_p75    | The 75th percentile of Bold Soil Index.                            |
| Elevation  | Elevation.                                                         |
| Slope      | Slope.                                                             |
| SOS        | Slope of slope.                                                    |
| R          | Roughness.                                                         |
| P          | Slope shape.                                                       |
| RF         | Relief.                                                            |

20 **Table S2: Detailed information of data used in this study.**

|                  | Landsat 8 surface reflectance (SR) imagery                                                                                                                                                                     | Shuttle Radar Topography Mission digital elevation model (SRTM DEM) data                                                                                                                     | GlobeLand30                                                                                                                                                                                | Google Earth images                                                                                                                                                                                          |
|------------------|----------------------------------------------------------------------------------------------------------------------------------------------------------------------------------------------------------------|----------------------------------------------------------------------------------------------------------------------------------------------------------------------------------------------|--------------------------------------------------------------------------------------------------------------------------------------------------------------------------------------------|--------------------------------------------------------------------------------------------------------------------------------------------------------------------------------------------------------------|
| Title            | USGS Landsat 8 Surface Reflectance Tier 1                                                                                                                                                                      | NASA SRTM Digital Elevation 30m                                                                                                                                                              | GlobeLand30                                                                                                                                                                                | /                                                                                                                                                                                                            |
| Version          | /                                                                                                                                                                                                              | Version 3                                                                                                                                                                                    | V2010                                                                                                                                                                                      | /                                                                                                                                                                                                            |
| Acquisition time | 2018                                                                                                                                                                                                           | 2000                                                                                                                                                                                         | 2010                                                                                                                                                                                       | Most images were accessed in 2018-2019                                                                                                                                                                       |
| URL              | <a href="https://developers.google.com/earth-engine/datasets/catalog/LANDSAT_LC08_C01_T1_SR">https://developers.google.com/earth-engine/datasets/catalog/LANDSAT_LC08_C01_T1_SR</a>                            | <a href="https://developers.google.com/earth-engine/datasets/catalog/USGS_SRTMGL1_003">https://developers.google.com/earth-engine/datasets/catalog/USGS_SRTMGL1_003</a>                      | <a href="http://www.globallandcov.com">http://www.globallandcov.com</a>                                                                                                                    | /                                                                                                                                                                                                            |
| Description      | This dataset is the surface reflectance from the Landsat 8 OLI/TIRS sensors. It has been atmospherically corrected and includes a cloud, shadow, water, and snow mask, as well as a per-pixel saturation mask. | This dataset is an international research effort that obtained DEM on a near-global scale. It has undergone a void-filling process using open-source data (ASTER GDEM2, GMTED2010, and NED). | This dataset is a 30-meter resolution global land cover data product. It is generated by integration of pixel-based and object-based methods with knowledge (POK) using multi-source data. | This dataset is a composited product combining multiple sets of satellite imagery. The satellite images are provided by different commercial image providers or government agencies at different zoom level. |
| Image sources    | /                                                                                                                                                                                                              | /                                                                                                                                                                                            | /                                                                                                                                                                                          | CNES / Airbus, Maxar Technologies, Landsat / Copernicus                                                                                                                                                      |
